# Supplementary material
Source: PubMed Central journal article supplement (PMC9093715)

**Disclosure Purpose:** 22-04695

## Summary of Interests

| Company or Organization                                                                                                                                                                                                                                                 |            |                                                                                                    |
|-------------------------------------------------------------------------------------------------------------------------------------------------------------------------------------------------------------------------------------------------------------------------|------------|----------------------------------------------------------------------------------------------------|
| Entity                                                                                                                                                                                                                                                                  | Type       | Interest Held By                                                                                   |
| Hanna Nohynek                                                                                                                                                                                                                                                           | Employment | Self                                                                                               |
| <i>Title:</i> Chief physician<br><i>Additional Information:</i> I receive regular monthly salary of a government employee the institute has got strategy of collaborating with industry under European Commission funding, but no direct industry payments are received |            | <i>Position Description:</i> Expert in respiratory diseases, covid-19 included, secretary of NITAG |

## Certification

I certify that the information provided in this disclosure is complete and accurate.

# Annelies Wilder-Smith

Apr 06, 2022 14:41:50 EDT  
New England Journal of Medicine

**Disclosure Purpose:** 22-04695

## Summary of Interests

I do not have any interests to disclose at this time.

## Certification

I certify that the information provided in this disclosure is complete and accurate.

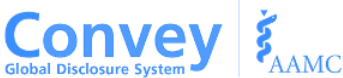

Supplement: NEJMe2204695_disclosures.pdf [file NEJMe2204695_disclosures.pdf]
